# Supplementary material for: A Pilot Genome-Scale Profiling of DNA Methylation in Sporadic Pituitary Macroadenomas: Association with Tumor Invasion and Histopathological Subtype
Source: PLoS One. 2014 Apr 29;9(4):e96178. doi: 10.1371/journal.pone.0096178 (PMC4004564; doi:10.1371/journal.pone.0096178)
Supplement: Table S4 — Gene subset of ion-channel activity signal pathway. The majority of genes were associated with potassium channels. (XLSX) [file pone.0096178.s012.xlsx]

## Sheet: Sheet1
Table S4. Gene subset of ion-channel activity signal pathway.
Gene Symbol	Rank in gene lista	Rank metric scoreb	Running ESc	Core Enrichmentd
KCNH4	115	4.29	0.03	Yes
TRPV2	248	3.47	0.05	Yes
KCNS1	407	2.91	0.07	Yes
CACNA1S	424	2.85	0.11	Yes
KCNK5	562	2.58	0.13	Yes
ACCN4	818	2.17	0.14	Yes
KCNQ5	921	2.03	0.17	Yes
CACNA1C	1081	1.85	0.19	Yes
KCNK6	1237	1.72	0.21	Yes
KCNA3	1378	1.61	0.23	Yes
KCNIP2	1426	1.57	0.26	Yes
KCNMB4	1577	1.46	0.28	Yes
TRPM2	2190	1.14	0.26	Yes
CHRNE	2324	1.08	0.28	Yes
CLCN3	2640	0.95	0.29	Yes
CHRNB4	2771	0.9	0.31	Yes
P2RX4	2794	0.9	0.35	Yes
KCNN4	3145	0.77	0.35	Yes
CLCN2	3164	0.76	0.38	Yes
P2RX1	3187	0.76	0.42	Yes
KCNC4	3869	0.55	0.39	No
HVCN1	5393	0.17	0.27	No
CUL5	6684	-0.11	0.17	No
P2RX5	6804	-0.14	0.2	No
PKD2	7048	-0.2	0.21	No
KCNH2	8194	-0.5	0.13	No
TRPC1	9159	-0.89	0.07	No
a Rank in gene list: position of the gene in the ranked list of genes
b Rank metric score: Score used to position the gene in the ranked list
c Running ES: the enrichment score at this point in the ranked list of genes
d Core enrichment: genes with a Yes value in this column contribute to the leading-edge subset within the gene set. This is the subset of genes that contributes most to the enrichment result.
